# Supplementary material for: Breakthrough in the large area photoanode fabrication process: high concentration precursor solution with solvent mixing and one step spin coating for high PEC performance of BiVO 4
Source: Royal Society of Chemistry journal article supplement (doi:10.1039/d4ta03349c), 2024-01-01
Supplement: d4ta03349c2.pdf [file d4ta03349c2.pdf]

## Supplementary video

# Breakthrough in Large Area Photoanode Fabrication Process: High Concentration Precursor Solution with Solvent Mix and One Step Spin Coating for High PEC Performance of BiVO<sub>4</sub>

Hoyoung Lee <sup>a, b</sup>, Gil-Seong Kang <sup>a</sup>, Hyobin Han <sup>b, c</sup>, Tae Woo Kim <sup>c</sup>, Jun-Hyuk Choi <sup>a</sup>, Dae-Geun Choi <sup>a</sup>, Joo-Yun Jung <sup>a</sup>, Jun-Ho Jeong <sup>a</sup>, Jong Hyeok Park <sup>b, \*</sup> and Jihye Lee <sup>a, \*</sup>

<sup>a</sup> Nano Lithography and Manufacturing Research Center, Nano-Convergence Manufacturing Research Division, Korea Institute of Machinery & Materials (KIMM), 156 Gajeongbuk-ro, Yuseong-gu, Daejeon 34103, Republic of Korea

<sup>b</sup> Department of Chemical and Biomolecular Engineering, Yonsei University, 50 Yonsei-ro, Seodaemun-gu, Seoul 03722, Republic of Korea

<sup>c</sup> Hydrogen Research Department, Korea Institute of Energy Research (KIER), 152 Gajeong-ro, Yuseong-gu, Daejeon 34219, Republic of Korea

Video S1. Hydrogen generation video of assembled PEC-PV system (576 cm<sup>2</sup>) containing 4 pieces of NiFeOOH/BVO (144 cm<sup>2</sup>) photoanode.
